# Supplementary material
Source: PubMed Central journal article supplement (PMC4739675)
Supplement: 10.1074_M115.051078_mcp.M115.051078-6.pdf [file 10.1074_M115.051078_mcp.M115.051078-6.pdf]

## SECRETED PROTEINS

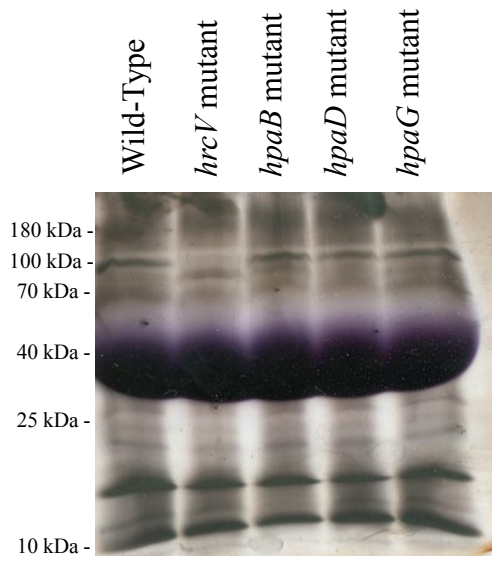

## BACTERIAL PELLETS

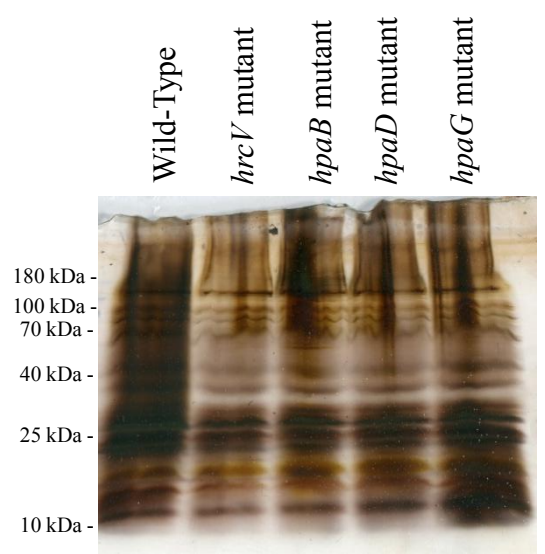

**SUPPLEMENTAL FIGURE S1**

**A**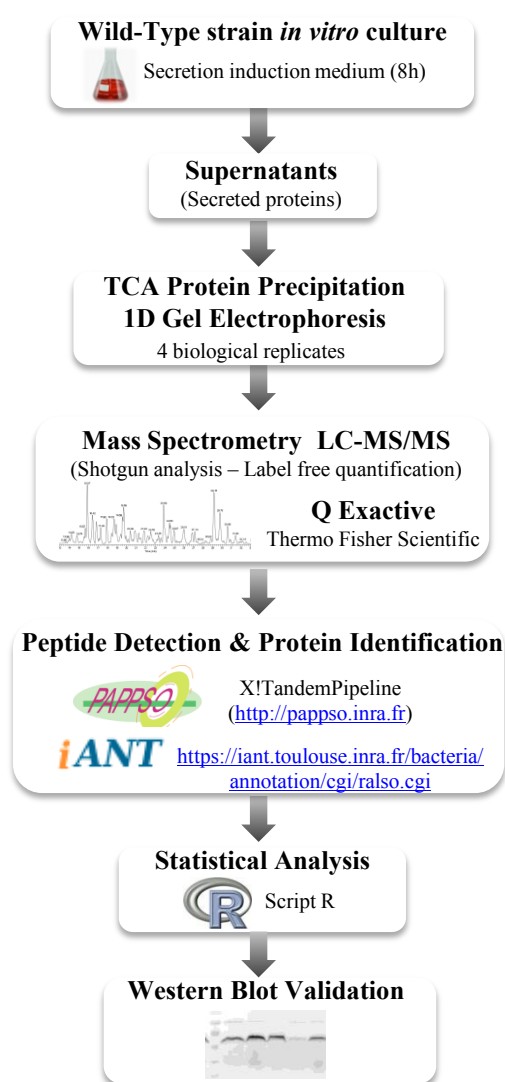**B**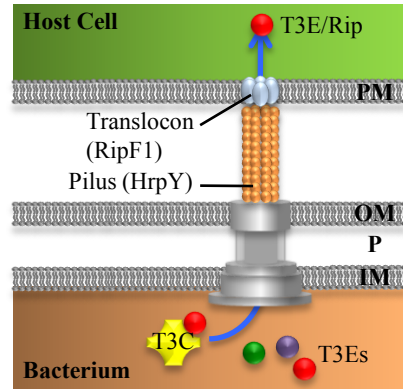**C**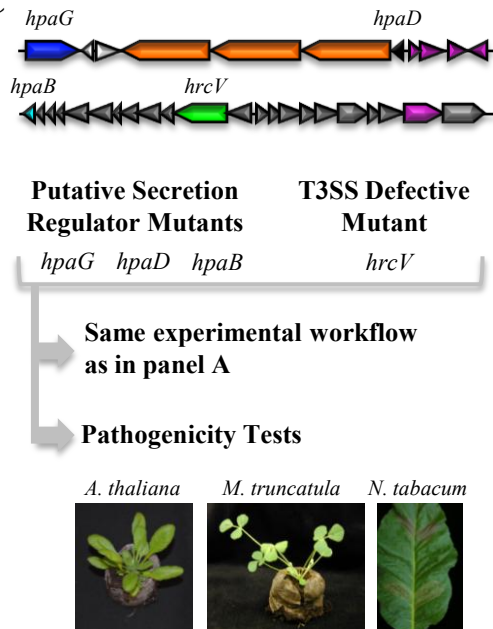**SUPPLEMENTAL FIGURE S2**

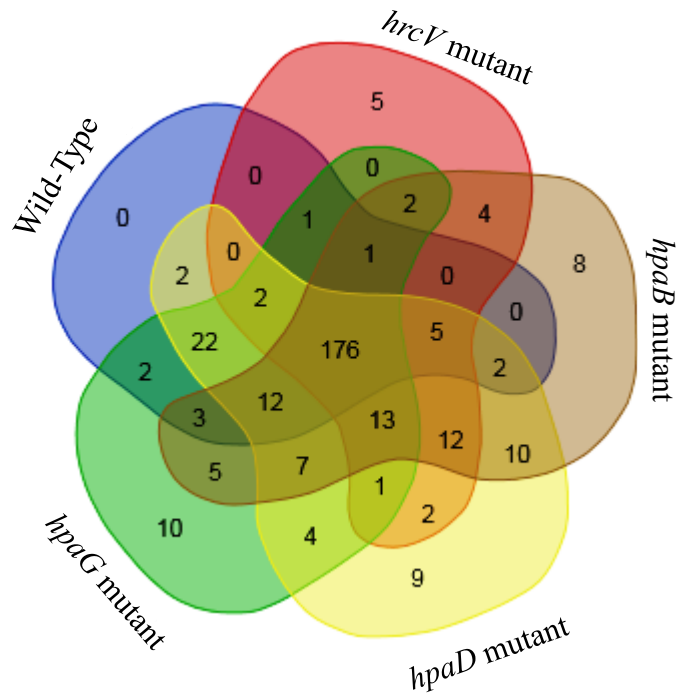

**SUPPLEMENTAL FIGURE S3**

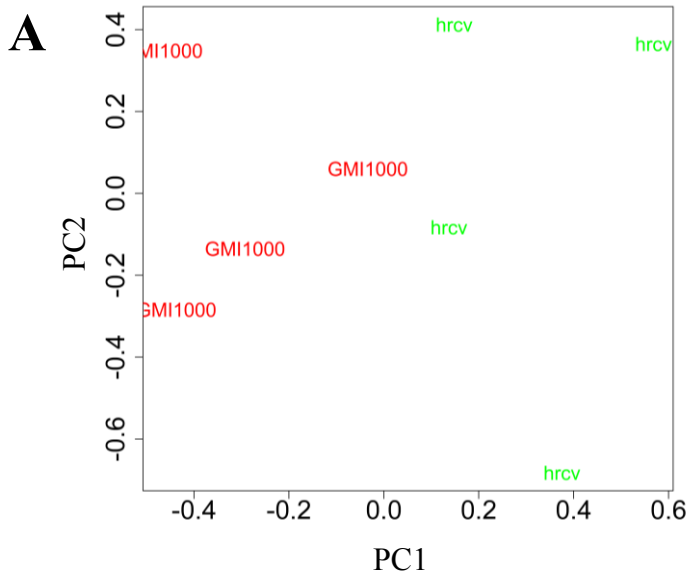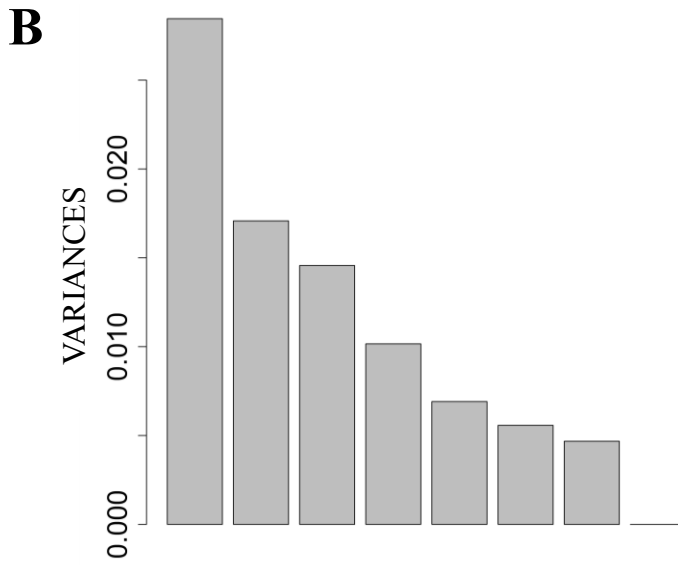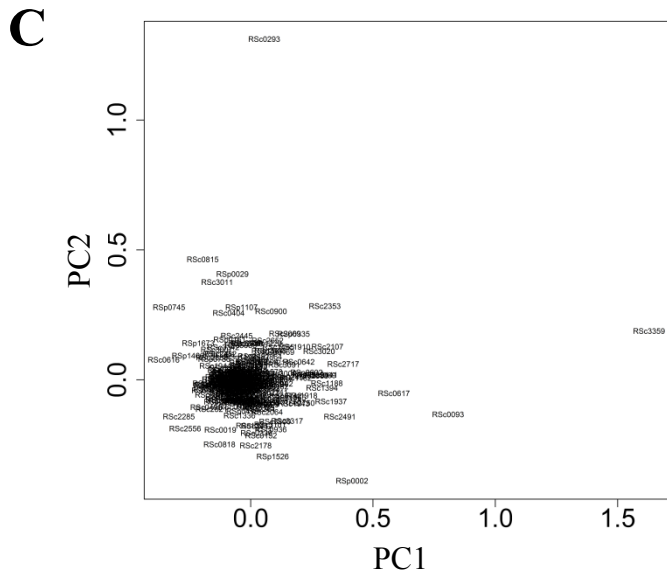

**SUPPLEMENTAL FIGURE S4**

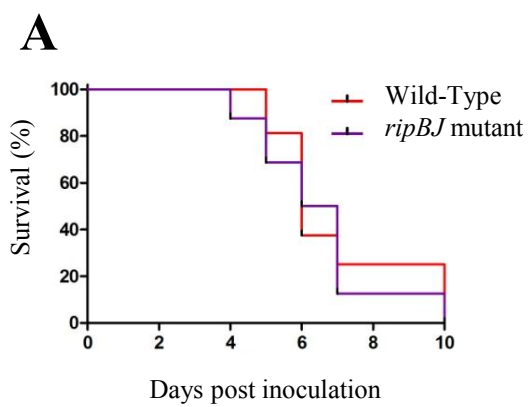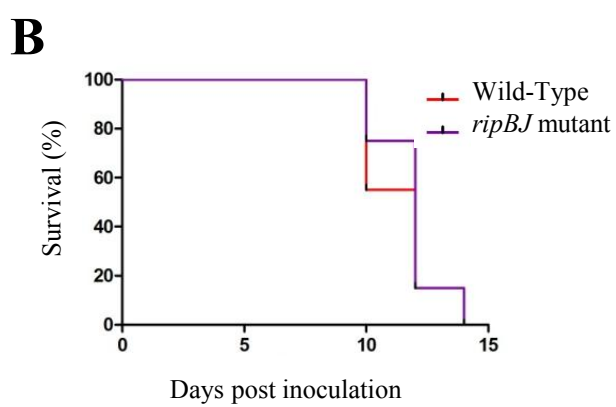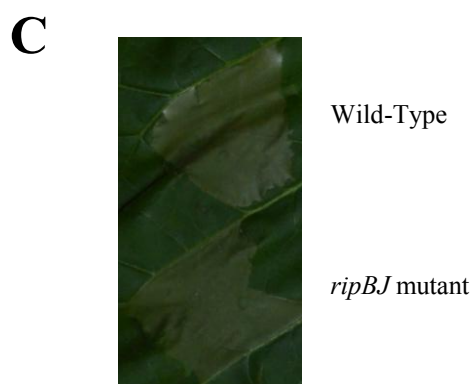

**D**

```

>RipBJ  MGCFNVTGASGKASDYVAERHANQPSTEQATQRPAA
>RipAG  MGCVNVTGASGKASDYVAERHANQPSTEQATQRPAA
>RipAH  MGCFNVTGTSGTASNIVAREHSVEASPTHTPQQTGR
>AvrRpm1 MGCVSSTSR
>AvrPto  MGNICVGGs
  
```

SUPPLEMENTAL FIGURE S5



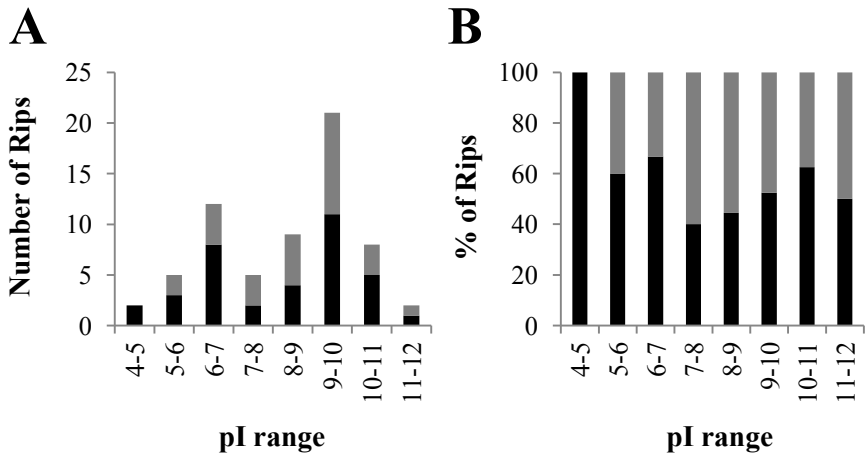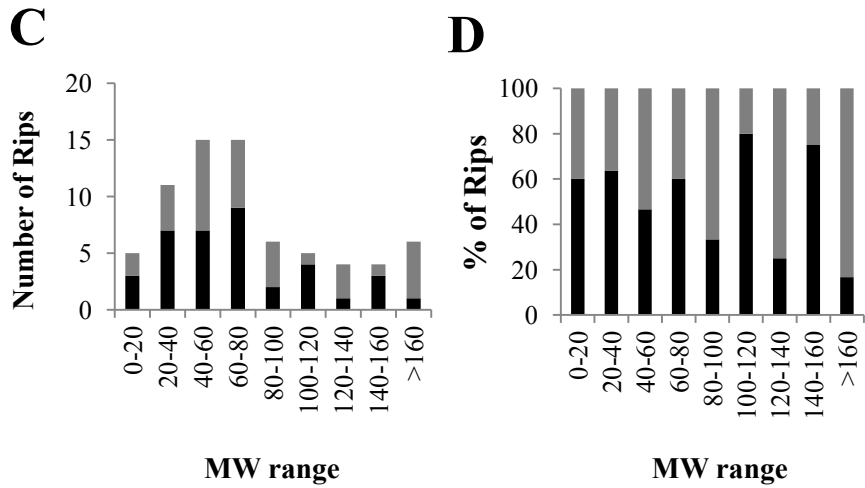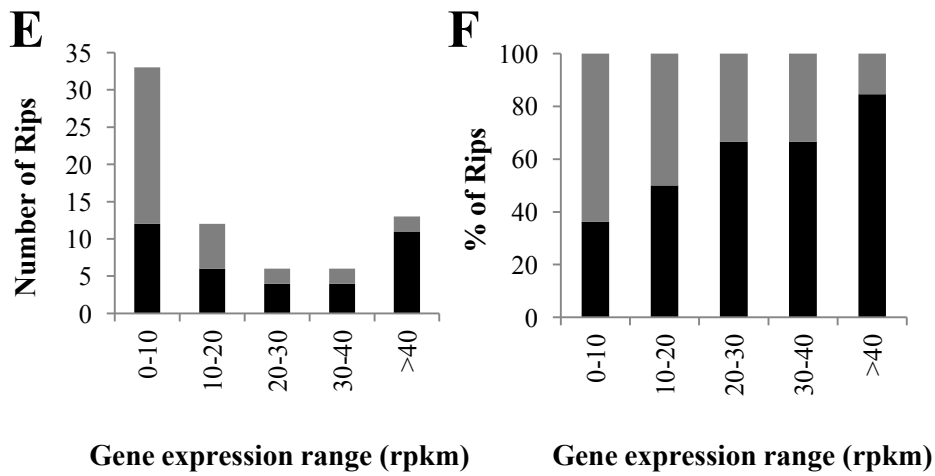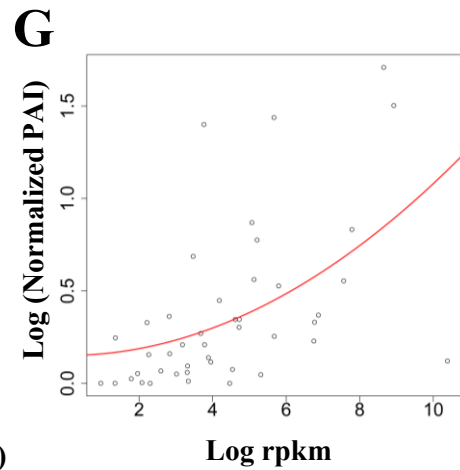

SUPPLEMENTAL FIGURE S7

**A**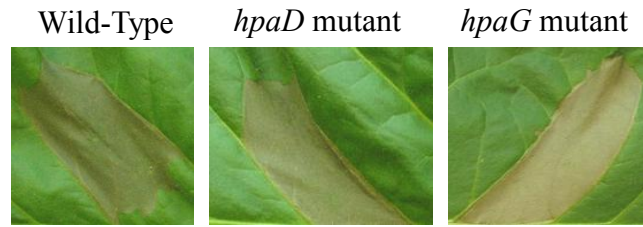**B**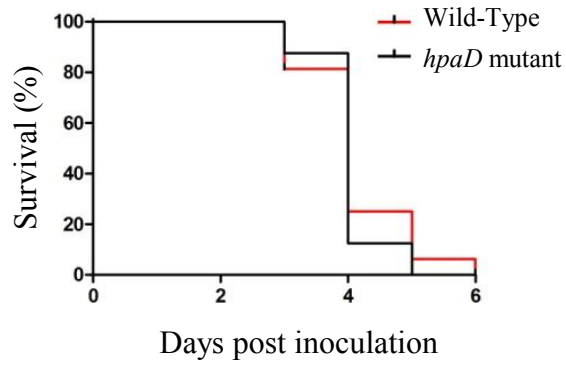**C**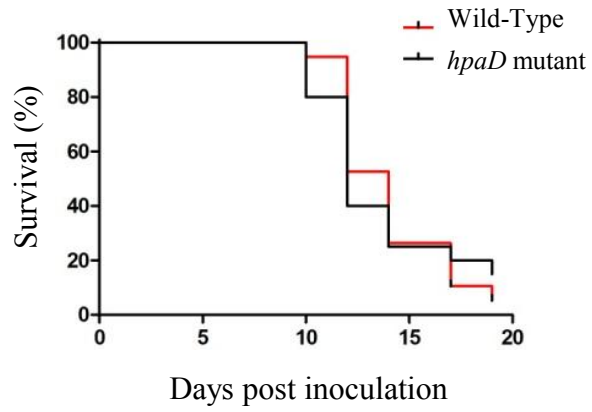**SUPPLEMENTAL FIGURE S8**
