# Supplementary material
Source: PubMed Central journal article supplement (PMC4739675)
Supplement: 10.1074_M115.051078_mcp.M115.051078-7.pdf [file 10.1074_M115.051078_mcp.M115.051078-7.pdf]

## Supplemental Experimental Procedures

List of the primers used for the cloning of *ripAB*, *ripAN*, *ripAV*, *ripD*, *ripH1*, *ripH2*, *ripH3*, *ripW*, *RSp0213* (renamed *ripBJ*, this work) T3Es and of *hpaB* and *hpaG*

| Rip/Hpa      | Gene           | Recipient Plasmid | Plasmid ID | Primer         | Primer Sequence                        |
|--------------|----------------|-------------------|------------|----------------|----------------------------------------|
| <b>RipAB</b> | <i>RSp0876</i> | pENTR/SD/D-TOPO   | pACC702    | <b>oACC226</b> | CACCATGAGCCACAGCAAATCAAG               |
|              |                |                   |            | <b>oACC227</b> | TCMGTCGTCGTCGTCCTTGATC                 |
| <b>RipAN</b> | <i>RSp0845</i> | pDONR207          | pACC220    | <b>oACC21</b>  | GGAGATAGAACCATGCGCCCCCTCTCTTTTC        |
|              |                |                   |            | <b>oACC22</b>  | CAAGAAAGCTGGGTCTCMGGCTTCCGGGGCGCCG     |
| <b>RipAV</b> | <i>RSp0732</i> | pDONR207          | pLBy14     | <b>oLB77</b>   | GGAGATAGAACCATGATCCCGAAAACACTC         |
|              |                |                   |            | <b>oLB78</b>   | CAAGAAAGCTGGGTCTCMCCCCACCGCCTC         |
| <b>RipD</b>  | <i>RSp0304</i> | pENTR/D-TOPO      | pAA3       | <b>oAA37</b>   | CACCATGGGAAATTTACAGATTAAG              |
|              |                |                   |            | <b>oAA39</b>   | GACGCGGTCGTAGTCGATCGA                  |
| <b>RipH1</b> | <i>RSc1386</i> | pDONR207          | pACC387    | <b>oACC3</b>   | GGAGATAGAACCATGGCAGGAGGACGAGTCG        |
|              |                |                   |            | <b>oACC4</b>   | CAAGAAAGCTGGGTCTCMTCCGGCCGGGCGCACGC    |
| <b>RipH2</b> | <i>RSp0215</i> | pDONR207          | pACC109    | <b>oACC13</b>  | GGAGATAGAACCATGCTTGGCGGAAACATCACGGA    |
|              |                |                   |            | <b>oACC14</b>  | CAAGAAAGCTGGGTCTCMATGCGCCCCCGGCGCGC    |
| <b>RipH3</b> | <i>RSp0160</i> | pDONR207          | pACC351    | <b>oLB53</b>   | GGAGATAGAACCATGTTGAAAGGACGTATCGACG     |
|              |                |                   |            | <b>oLB54</b>   | CAAGAAAGCTGGGTCTCMCCCGGAAGCCGGCAGCTTGA |
| <b>RipW</b>  | <i>RSc2775</i> | pDONR207          | pACC478    | <b>oACC61</b>  | GGAGATAGAACCATGTCCATCCAGATTGATCGC      |
|              |                |                   |            | <b>oACC89</b>  | CAAGAAAGCTGGGTCTCCGCCCAGTAGGCCTTGTAG   |
| <b>RipBJ</b> | <i>RSp0213</i> | pENTR/SD/D-TOPO   | pACC750    | <b>oACC214</b> | CACCATGGGATGTTTTAATGTCACTG             |
|              |                |                   |            | <b>oACC277</b> | ACGGCCGGGGCGGTAGC                      |
| <b>HpaB</b>  | <i>RSp0853</i> | pDONR207          | pLBy5      | <b>oLB15</b>   | GGAGATAGAACCATGAGCCTTGAGCAACGCGATG     |
|              |                |                   |            | <b>oLB16</b>   | CAAGAAAGCTGGGTCTCMTGCGCGAATCCATAG      |
| <b>HpaG</b>  | <i>RSp0842</i> | pENTR/SD/D-TOPO   | pACC646    | <b>oACC167</b> | CACCATGCAATCGCTCACCGGTAT               |
|              |                |                   |            | <b>oACC121</b> | TCMGTGGATCGTCGGCGTGCC                  |
